# Supplementary material
Source: HighWire-hosted journal article supplement (https://cmaj.ca/highwire/filestream/57830/field_highwire_adjunct_files/0/hormone-wathen-f.pdf)
Supplement: hormone-wathen-f.pdf [file hormone-wathen-f.pdf]

# L'hormonothérapie substitutive pour la prévention primaire des maladies chroniques : recommandations du Groupe d'étude canadien sur les soins de santé préventifs.

C. Nadine Wathen, Denice S. Feig, John W. Feightner, Beth L. Abramson, Angela M. Cheung et le Groupe d'étude canadien sur les soins de santé préventifs

## Recommandations

- Compte tenu de la pondération des préjudices et des avantages, le Groupe d'étude canadien sur les soins de santé préventifs se prononce contre l'utilisation de la thérapie aux œstrogènes et à la progestine combinés et de la thérapie aux œstrogènes seulement pour la prévention primaire de maladies chroniques chez les femmes ménopausées (recommandation de catégorie D).
- Les femmes qui veulent atténuer les symptômes de la ménopause par l'hormonothérapie substitutive (HTS) doivent discuter avec leur médecin des avantages et des risques possibles de l'HTS.

Au début des années 1990, le Groupe d'étude canadien sur les soins de santé préventifs a diffusé une recommandation de catégorie B au sujet des conseils donnés aux femmes en péri-ménopause sur l'utilisation de l'œstrogénothérapie de remplacement (OTR) pour la prévention primaire des fractures ostéoporotiques<sup>1</sup>. Les grandes études par observation qui constituaient à l'époque les meilleures données probantes disponibles ont indiqué en outre que l'OTR pouvait présenter un avantage cardioprotecteur pour les femmes<sup>2-4</sup> et prévenir la déperdition osseuse<sup>1,5</sup>. Les premières grandes études par observation ont indiqué un risque faible mais important de cancer du sein<sup>6-8</sup> et de cancer de l'endomètre chez les femmes dont l'utérus était intact et qui suivaient une thérapie aux œstrogènes non compensés<sup>9</sup>.

La masse des données probantes a grossi au cours de la dernière décennie, car on a réalisé de nombreuses études cliniques au sujet des effets positifs et négatifs possibles de l'HTS sur diverses maladies chroniques. Le présent énoncé repose sur trois études systématiques réalisées par le groupe d'étude<sup>6,10,11</sup> et par

Ce tableau doit servir à guider les discussions avec les patientes. Leur profil de risque individuel peut modifier l'équilibre entre les préjudices et les avantages.

**Tableau 1 : Taux annuels d'événements évités ou causés par 10 000 femmes suivant une hormonothérapie substitutive (HTS) aux œstrogènes et à la progestine combinés ou aux œstrogènes seulement, par rapport à celles qui prennent un placebo.**

| Résultat                                                   | HTS œstrogènes et progestine combinés |       | HTS œstrogènes seulement |       |
|------------------------------------------------------------|---------------------------------------|-------|--------------------------|-------|
|                                                            | Évité                                 | Causé | Évité                    | Causé |
| <b>Événements reliés aux maladies cardiovasculaires</b>    |                                       |       |                          |       |
| Événements reliés aux coronaropathies                      | —                                     | 7*    | —                        | —     |
| Accident vasculaire cérébral                               | —                                     | 8*    | —                        | 12†   |
| Thromboembolie                                             | —                                     | 18*   | —                        | 7†    |
| Total des événements reliés aux maladies cardiovasculaires | —                                     | 25*   | —                        | 24†   |
| <b>Cancer</b>                                              |                                       |       |                          |       |
| Sein (envahissant)                                         | —                                     | 8*    | —                        | —     |
| Ovaire                                                     | —                                     | —     | —                        | 2‡    |
| Colorectal                                                 | 6*                                    | —     | —                        | —     |
| <b>Cholécystite</b>                                        |                                       |       |                          |       |
| < 5 ans de thérapie ou utilisation d'un placebo            | —                                     | 25§   | —                        | —     |
| ≥ 5 ans de thérapie ou d'utilisation d'un placebo          | —                                     | 53,5§ | —                        | —     |
| <b>Fracture</b>                                            |                                       |       |                          |       |
| Hanche                                                     | 5*                                    | —     | 6†                       | —     |
| Vertèbre                                                   | 6*                                    | —     | 6†                       | —     |
| Autre (y compris poignet)                                  | 39*                                   | —     | —                        | —     |
| Total                                                      | 44*                                   | —     | 56†                      | —     |

\*Ces données sont tirées de l'étude sur l'HTS combinée aux œstrogènes et à la progestine de l'Initiative sur la santé des femmes (ISF)<sup>10,11</sup> dans le cadre de laquelle le régime d'HTS est constitué d'une combinaison quotidienne d'œstrogènes équins conjugués par voie orale (0,625 mg) et d'acétate de médroxyprogesterone (2,5 mg).

†Ces données sont tirées du volet portant sur les œstrogènes seulement de l'ISM<sup>12</sup> au cours duquel le régime quotidien d'HTS aux œstrogènes seulement était constitué d'œstrogènes équins conjugués par voie orale (0,625 mg).

‡Ces données proviennent de Lacey *et al.*<sup>13</sup>.

§Ces données proviennent de l'étude systématique et de la méta-analyse de Nelson *et al.*<sup>12</sup>

## Données probantes et résumé clinique

## Maladie cardiovasculaire

- Les femmes qui ont participé au volet œstrogènes-progestine de l'ISF<sup>13,21</sup> présentaient un risque relatif (RR) accru de résultats indésirables d'une maladie cardiovasculaire de 22 % (rapport de danger [RD] 1,22, intervalle de confiance [IC] à 95 % rajusté, 1,00–1,49, ce qui représente 25 événements de plus par 10 000 années-personnes d'HTS [157 c. 132 événements pour 10 000])<sup>21</sup>. Chez les femmes qui ont participé au volet œstrogènes seulement de l'ISF, on n'a constaté aucune différence au niveau des événements de coronaropathie (RD, 0,091, IC à 95 % rajusté, 0,72–1,15), mais le risque d'accident vasculaire cérébral a augmenté de 39 %, ce qui représente 12 événements de plus par 10 000 années-personnes (RD 1,39, IC à 95 % rajusté, 0,97–1,99). Le risque de thromboembolie a augmenté de 33 %, ce qui représente 7 événements de plus par 10 000 années-personnes. Le taux d'événements totaux de maladies cardiovasculaires, y compris l'accident vasculaire cérébral, a augmenté de 12 % chez les sujets qui ont pris des œstrogènes seulement, ce qui représente 24 événements de plus (RD 1,12, IC à 95 % rajusté, 0,97–1,30)<sup>14</sup>. Ces constatations concordent avec les résultats d'un certain nombre, mais non la plupart, des études par observation antérieures et des études de prévention secondaire<sup>22,23</sup> qui ont été revues par Abramson<sup>10</sup> et résumées dans la livraison du 27 avril du *JAMC*<sup>24</sup>.

## Cancers

- On établit un lien avec l'utilisation à long terme de l'HTS aux œstrogènes non compensés ou de l'hormonothérapie combinée et un risque accru de cancer du sein qui augmente en fonction de la durée de l'utilisation<sup>12</sup>. Les résultats du volet œstrogènes et progestine combinés de l'ISM ont indiqué un RD de 1,26 (IC à 95 % rajusté, 1,0–1,59), ce qui représente 8 cas de plus de cancer du sein envahissant par 10 000 années-personnes d'HTS (38 c. 30 événements pour 10 000 années-personnes) après 5,2 ans<sup>13</sup>. L'étude portant sur un million de femmes a montré récemment que comparativement aux femmes qui n'avaient jamais eu recours à l'HTS, celles qui suivaient une HTS étaient 1,66 fois plus susceptibles d'avoir un cancer du sein et 1,22 fois plus susceptibles d'en mourir<sup>25</sup>. Des données récentes indiquent que l'hormonothérapie combinée à la progestine peut entraîner un risque plus élevé que la thérapie aux œstrogènes non compensés<sup>13,25–27</sup>.
- Des données indiquent qu'il y a un lien entre l'HTS de longue durée et un risque accru de cancer de l'ovaire<sup>28–30</sup>, mais les études ont produit des résultats mitigés<sup>31,32</sup>.
- On établit un lien entre les thérapies aux œstrogènes non compensés à court terme et à long terme et un risque accru de cancer de l'endomètre chez les femmes qui ont l'utérus intact (RR 2,3, IC à 95 %, 2,1–2,5)<sup>33</sup>. On n'établit pas de lien entre la thérapie combinée, surtout lorsqu'on utilise des progestines pendant plus de 10 jours, et toute augmentation significative du risque, comme l'indiquent les résultats de l'ISM (RD 0,83, IC à 95 % rajusté, 0,23–2,32) et la méta-analyse que Grady et ses collaborateurs<sup>33</sup> ont effectuée d'études par observation (RR global 0,8, IC à 95 % 0,6–1,2).
- On établit un lien entre la thérapie aux œstrogènes non compensés ou la thérapie combinée (sans égard à la dose ni à la durée) et une baisse du risque de cancer colorectal. Les résultats de l'ISF (RD 0,63, IC à 95 % rajusté, 0,32–1,24 ou 6 cancers de moins par 10 000 années-personnes d'HTS [10 c. 16 événements par 10 000]) concordent avec la méta-analyse que Grodstein et ses collaborateurs<sup>34</sup> ont réalisée d'études par observation et qui a révélé un RR de 0,80 chez les femmes qui n'avaient jamais eu recours à l'HTS (IC à 95 %, 0,74–0,86) et 0,66 chez celles qui suivent actuellement une HTS (IC à 95 %, 0,59–0,74). C'est le caractère récent de l'HTS qui semble lui conférer son avantage plutôt que simplement le fait de l'avoir utilisée par le passé<sup>34,35</sup>.
- Le volet œstrogènes-progestine<sup>13</sup> et le volet œstrogènes seulement<sup>14</sup> ont signalé des RD composés pour tous les cancers inclus dans leurs analyses de 1,03 (IC à 95 % rajusté, 0,86–1,22) et de 0,93 (IC à 95 % rajusté, 0,75–1,15) respectivement, ce qui concorde avec les résultats d'études antérieures.

## Fractures ostéoporotiques

- Même si des données acceptables indiquent que l'HTS est efficace pour la prévention primaire des fractures, les risques que présente cette thérapie peuvent l'emporter sur les avantages<sup>14,36</sup>.

## Autres résultats

- Les femmes qui suivent une HTS sont à risque accru de :
  - thromboembolie veineuse (thrombose veineuse profonde et embolie pulmonaire) (RD 2,11, IC à 95 % rajusté 1,26–3,55)<sup>13</sup>
  - cholécystite au cours des cinq premières années (RR 1,8, IC à 95 %, 1,6–2,0); l'utilisation soutenue alourdit ce risque (RR 2,5, IC à 95 %, 2,0–2,9)<sup>37</sup>.

- démence probable, car les résultats de la récente étude de l'ISF sur la mémoire indiquent un RD de 2,05 (IC à 95 %, 1,21–3,48, ce qui représente 23 cas de démence de plus par 1000 années-personnes (22 cas par 10 000 années-personnes)<sup>38</sup>.
- aggravation de l'incontinence urinaire chez les femmes déjà aux prises avec l'incontinence (risque relatif sommaire de 1,51, IC à 95 %, 1,26–1,82)<sup>39</sup>.
- On n'a pas constaté que l'HTS améliore la qualité de vie liée à la santé, particulièrement chez les femmes asymptomatiques<sup>40</sup>, ni qu'elle prévient les déficits légers de la cognition<sup>41</sup>.

#### Répercussions cliniques

- Avant la publication des résultats de l'étude de l'ISF sur les œstrogènes et la progestine, on a estimé que 22 % des femmes canadiennes suivaient une HTS et que celles de 50 à 54 ans présentaient le pourcentage le plus élevé d'utilisation (33 %)<sup>42</sup>. Même si beaucoup de femmes suivaient une HTS combinée pour la prévention d'une maladie chronique, les preuves actuelles indiquent que les préjudices l'emportent sur les avantages et démontrent un risque accru de cancer du sein, de thromboembolie veineuse, d'embolie pulmonaire, d'accident vasculaire cérébral, d'infarctus du myocarde, de démence probable, de cholécystite et d'aggravation de l'incontinence, et un risque réduit de fractures ostéoporotiques et de cancer colorectal. L'utilisation de l'HTS chez les femmes ménopausées qui ne présentent pas de symptômes de la ménopause n'améliore en outre pas les résultats de la qualité de vie liée à la santé, y compris la dépression, le sommeil, la fonction sexuelle et la qualité de vie générale autoévaluée<sup>40</sup>. Les résultats publiés récemment de l'étude menée par l'ISF sur les œstrogènes seulement<sup>14</sup>, qui montrent une augmentation du risque d'accident vasculaire cérébral et une diminution du risque de fracture de la hanche, appuient de plus le concept selon lequel l'HTS, que les œstrogènes soient non compensés ou combinés à la progestine, ne devrait pas servir à prévenir les maladies chroniques.
- Beaucoup de femmes, et en particulier celles qui en sont au début de la ménopause, cherchent toutefois à suivre une HTS pour contrôler les symptômes de la ménopause<sup>43</sup>, et en particulier ses effets vasomoteurs, aspect à l'égard duquel on a démontré des avantages<sup>44</sup>. Les femmes qui veulent atténuer les symptômes de la ménopause par l'HTS doivent discuter avec leur médecin des avantages et des risques possibles (Tableau 1). Si les risques sont acceptables pour la patiente et son médecin, une thérapie la plus brève possible et à la dose la plus faible possible peut être indiquée<sup>15–18</sup>.
- Même si le débat scientifique et la sous-analyse des données existantes se poursuivent, les données probantes disponibles indiquent que des résultats indésirables particuliers peuvent se produire à différentes périodes après le début de l'HTS. Dans le cas de la thérapie aux œstrogènes et à la progestine combinés, le risque de certains événements cardiovasculaires semble augmenter peu après le début de la thérapie, au cours des premiers mois dans le cas de la coronaropathie et de la thromboembolie veineuse et environ 18 mois après le début de la thérapie dans celui de l'accident vasculaire cérébral. Dans les trois cas, le risque élevé persiste au moins pendant les cinq premières années de l'HTS. Par ailleurs, le risque de cancer du sein envahissant n'augmente que plus tard au cours de la thérapie, vers la quatrième année. Dans le cas de la thérapie aux œstrogènes seulement, le risque accru d'accident vasculaire cérébral au cours de la première année continue d'augmenter pendant les 6,8 ans du suivi, tandis que le risque légèrement accru de coronaropathie au début de la période de suivi diminue au fil du temps. Ces renseignements peuvent aider les femmes à décider d'entreprendre ou non une HTS pour soulager les symptômes de la ménopause et, si elles décident d'aller de l'avant, pendant combien de temps elles la suivront.

d'autres chercheurs<sup>12</sup> au sujet des avantages et des préjudices possibles de l'HTS et inclut les résultats des études portant sur les œstrogènes conjugués à la progestine et les œstrogènes seulement réalisées dans le contexte de l'Initiative pour la santé des femmes (ISF) et auxquelles on a mis fin plus tôt que prévu en mai 2002 et février 2004, respectivement, en raison de problèmes de sécurité<sup>13,14</sup>. Dans cet énoncé, on ne passe pas en revue les données probantes sur l'utilisation de l'HTS pour traiter les symptômes

de la ménopause. On présente plutôt une brève discussion portant sur des facteurs dont il pourrait être utile que les cliniciens et leurs patientes tiennent compte lorsqu'ils doivent décider si la patiente doit suivre une HTS pour soulager les symptômes, ainsi qu'un bilan des risques et des avantages (Tableau 1).

#### Recommandations d'autres groupes

Le Preventive Services Task Force<sup>15</sup> des États-Unis, l'Ameri-

can College of Obstetricians and Gynecologists<sup>16</sup>, la North American Menopause Society (NAMS)<sup>17</sup>, Santé Canada<sup>18</sup>, la Food and Drug Administration (FDA)<sup>19</sup> américaine et, dans un énoncé conjoint, la Fondation des maladies du cœur du Canada, la Société des obstétriciens et gynécologues du Canada et la Société canadienne de cardiologie<sup>20</sup> ont tous recommandé que les femmes qui n'ont pas de symptômes ne suivent pas de thérapie aux œstrogènes et à la progestine combinés pour

prévenir des maladies cardiovasculaires ou d'autres maladies chroniques, parce que les risques l'emportent sur les avantages. Ces groupes recommandent aux femmes qui envisagent une HTS de discuter de leurs risques particuliers avec leur médecin. Ils ont aussi recommandé que les femmes qui décident de suivre une HTS pour soulager les symptômes de la ménopause prennent la dose la plus faible possible le moins longtemps possible, et que l'on réévalue périodiquement la nécessité de l'HTS. La FDA et la NAMS ont étendu ces recommandations à toutes les préparations d'œstrogènes, y compris d'œstrogènes non compensés. Elles sont toutes deux d'avis que tant qu'on ne disposera pas de preuves découlant d'études contrôlées et randomisées illustrant des avantages, il faut recourir à d'autres moyens de réduire les risques de maladies cardiovasculaires et de cancer (p. ex., cesser de fumer, changer ses habitudes de vie et son alimentation).

Nadine Wathen est chercheuse universitaire au Département de psychiatrie et de neurosciences du comportement, à l'Université McMaster, Hamilton (Ontario). Denice Feig, membre du groupe d'étude, est à l'Hôpital Mount Sinai et professeure adjointe aux départements de médecine, d'obstétrique et de gynécologie, ainsi que de gestion et d'évaluation des politiques de la santé, à l'Université de Toronto, Toronto (Ontario). John Feightner, président du groupe d'étude, est professeur au Département de médecine familiale de l'Université Western Ontario, à London (Ontario). Beth Abramson est professeure adjointe de médecine à Toronto et directrice du Centre de prévention des maladies cardiaques et de la santé cardiovasculaire des femmes, Hôpital St. Michael's, Toronto (Ontario). Angela Cheung est directrice du Programme d'ostéoporose et directrice associée du Programme de la santé des femmes, Réseau de santé universitaire, et professeure adjointe à la Faculté de médecine de l'Université de Toronto, Toronto (Ontario).

**Intérêts concurrents :** Nadine Wathen a reçu du financement de recherche de Wyeth Canada. Angela Cheung a touché des honoraires pour participer à des événements de FMC subventionnés en partie ou totalement par Eli Lilly, Merck, Proctor & Gamble, Aventis et Novartis. Ces entreprises ont aussi versé des subventions d'éducation sans restriction pour appuyer des séances scientifiques sur l'ostéoporose à la grandeur de la ville de Toronto, présidées par Angela Cheung. Beth Abramson ou les membres du Groupe d'étude canadien sur les soins de santé préventifs n'ont pas déclaré d'intérêts concurrents.

**Contributeurs :** Nadine Wathen a rédigé le présent article et y a apporté des révisions subséquentes. Denice Feig, Beth Abramson et Angela Cheung sont les auteures des critiques originales systématiques des données probantes, ont soumis l'article à un examen critique et ont revu les révisions subséquentes. John Feightner a soumis le présent article à un examen critique et a revu les révisions subséquentes. Le Groupe d'étude canadien sur les soins de santé préventifs a soumis les données probantes à un examen critique et a formulé les recommandations en suivant sa méthodologie et son processus de dégagement de consensus.

Le Groupe d'étude canadien sur les soins de santé préventifs est un groupe indépendant financé par un partenariat entre les gouvernements fédéral et provinciaux/territoriaux du Canada.

## Références

1. Feig DS. Prévention des fractures ostéoporotiques chez la femme au moyen de l'œstrogénothérapie substitutive. Dans : Groupe d'étude canadien sur l'examen médical périodique. *Guide canadien de médecine clinique préventive*. Ottawa : Santé Canada; 1994. p. 703-16.
2. Wolf PH, Madans JH, Finucane FF, Higgins M, Kleinman JC. Reduction of cardiovascular disease-related mortality among postmenopausal women who use hormones: evidence from a national cohort. *Am J Obstet Gynecol* 1991;164:489-94.
3. Stampfer MJ, Colditz GA. Estrogen replacement therapy and coronary heart disease: a quantitative assessment of the epidemiologic evidence. *Prev Med* 1991;20:47-63.
4. Barrett-Connor E. Estrogen and estrogen-progestogen replacement: therapy and cardiovascular diseases. *Am J Med* 1993;95(Suppl 5A):40S-3S.
5. Ettinger B, Genant HK, Cann CE. Long-term estrogen replacement therapy prevents bone loss and fractures. *Ann Intern Med* 1985;102:319-24.
6. Cheung AM, Proctor WR, Stewart DE, avec le Groupe d'étude canadien sur les soins de santé préventifs. *The effect of hormone replacement therapy on cancer in postmenopausal women: systematic review* [GECSSP Rapport technique n° 03-3]. Londres (Ontario) : le Groupe d'étude; 2003.
7. Steinberg KK, Thacker SB, Smith SJ, Stroup DF, Zack MM, Flanders WE, et al. A meta-analysis of the effect of estrogen replacement therapy on the risk of breast cancer. *JAMA* 1991; 265:1985-90.
8. Groupe de collaboration de l'OMS sur les facteurs hormonaux dans le cancer du sein. Breast cancer and hormone replacement therapy: collaborative reanalysis of data from 51 epidemiological studies of 52,705 women with breast cancer and 108,411 women without breast cancer. *Lancet* 1997;350:1047-59.
9. Gambrell RD Jr, Massey FM, Castaneda TA, Ugenas AJ, Ricci CA, Wright JM. Use of the progestogen challenge test to reduce the risk of endometrial cancer. *Obstet Gynecol* 1980;55(6):732-8.
10. Abramson B, avec le Groupe d'étude canadien sur les soins de santé préventifs. *Postmenopausal hormone replacement therapy for the primary prevention of cardiovascular and cerebrovascular disease. Systematic review and recommendations*. GECSSP Rapport technique n° 03-2. Londres (Ontario) : le Groupe d'étude; 2003.
11. Cheung AM, Feig DS, Kapral MK, Diaz-Granados N, Dodin S, avec le Groupe d'étude canadien sur les soins de santé préventifs. *Prevention of osteoporosis and osteoporotic fractures in postmenopausal women: systematic review & recommendations*. GECSSP Rapport technique n° 03-1. Londres (Ontario) : le Groupe d'étude; 2003.
12. Nelson HD, Humphrey LL, Nygren P, Teutsch SM, Allan JD. Postmenopausal hormone replacement therapy: scientific review. *JAMA* 2002;288(7):872-81.
13. Writing Group for the Women's Health Initiative Investigators. Risks and benefits of estrogen plus progestin in healthy postmenopausal women: principal results from the Women's Health Initiative randomized controlled trial. *JAMA* 2002;288(3):321-33.
14. Anderson GL, Limacher M, Assaf AR, Bassford T, Beresford SA, Black H, et al; Women's Health Initiative Steering Committee. Effects of conjugated equine estrogen in postmenopausal women with hysterectomy: the Women's Health Initiative randomized controlled trial. *JAMA* 2004;291(14):1704-12.
15. US Preventive Services Task Force. Postmenopausal hormone replacement therapy for the primary prevention of chronic conditions: recommendations and rationale. *Ann Intern Med* 2002;137(10):834-9.
16. American College of Obstetricians and Gynecologists. Questions and answers on hormone therapy [communiqué de presse]. Washington : le Collège; août 2002. Disponible : [www.acog.org/from\\_home/publications/press\\_releases/nr08-30-02.cfm](http://www.acog.org/from_home/publications/press_releases/nr08-30-02.cfm) (consulté le 3 mars 2004).
17. North American Menopausal Society. *Estrogen and progestogen use in peri- and post-menopausal women: September 2003 position statement from the North American Menopause Society*. Cleveland: la Société; 2003. Disponible : [www.menopause.org/aboutmeno/HTpositionstatement.pdf](http://www.menopause.org/aboutmeno/HTpositionstatement.pdf) (consulté le 3 mars 2004).
18. Avantages et risques liés au traitement hormonal substitutif combiné (œstrogène et progestatif). Dans : *Votre santé et vous*. Ottawa : Santé Canada; document mis à jour le 21 janvier 2004. Disponible : [www.hc-sc.gc.ca/francais/vsv/aspect\\_medical/hormonal.html](http://www.hc-sc.gc.ca/francais/vsv/aspect_medical/hormonal.html) (consulté le 3 mars 2004).
19. US Food and Drug Administration (FDA). FDA approves new labeling and provides new advice to postmenopausal women who use or who are considering using estrogen and estrogen with progestin [fiche d'information de la FDA]. Washington : FDA; 8 janvier 2003. Disponible : [www.fda.gov/oc/factsheets/WHI.htm](http://www.fda.gov/oc/factsheets/WHI.htm) 1 (consulté le 3 mars 2004).
20. Abramson BL, Derzko C, Lalonde A, Reid R, Turek M, Weiglsoz A. Hormone replacement therapy and cardiovascular disease : énoncé conjoint de la Fondation des maladies du cœur du Canada, de la Société des obstétriciens et gynécologues du Canada et de la Société canadienne de cardiologie. *J Can Cardiol* 2000;18(7):723-4.
21. Manson JE, Hsia J, Johnson KC,

- Rossouw JE, Assaf AR, Lasser NL, et al. Estrogen plus progestin and the risk of coronary heart disease. *N Engl J Med* 2002;349(6):523-34.
22. Hulley S, Grady D, Bush T, Furberg C, Herrington D, Riggs B, et al. Randomized trial of estrogen plus progestin for secondary prevention of coronary heart disease in postmenopausal women. *JAMA* 1998;280:605-13.
  23. Herrington DM, Reboussin DM, Brosnihan KB, Sharp PC, Shumaker SA, Snyder TE, et al. Effects of estrogen replacement on the progression of coronary-artery atherosclerosis. *N Engl J Med* 2000;343(8):522-9.
  24. L'hormonothérapie substitutive après la ménopause pour la prévention primaire de maladies cardiovasculaires et cérébrovasculaires. Recommandations du Groupe de travail canadien sur les soins de santé préventifs. *JAMC* 2004;170(9):1388-9.
  25. Beral V; Million Women Study Collaborators. Breast cancer and hormone-replacement therapy in the Million Women Study [erratum publié dans *Lancet* 2003;362:1160]. *Lancet* 2003;362:419-27.
  26. Schairer C, Lubin J, Troisi R, Sturgeon S, Brinton L, Hoover R. Menopausal estrogen and estrogen-progestin replacement therapy and breast cancer risk. *JAMA* 2000;283:485-91.
  27. Persson I, Weiderpass E, Bergkvist L, Bergstrom R, Schairer C. Risks of breast and endometrial cancer after estrogen and estrogen-progestin replacement. *Cancer Causes Control* 1999;10(4):253-60.
  28. Tavani A, Ricci E, La Vecchia C, Surace M, Benzi G, Parazzini F, et al. Influence of menstrual and reproductive factors on ovarian cancer risk in women with and without family history of breast or ovarian cancer. *Int J Epidemiol* 2000;29:799-802.
  29. Riman T, Dickman PW, Nilsson S, Correia N, Nordlinder H, Magnusson CM, et al. Hormone replacement therapy and the risk of invasive epithelial ovarian cancer in Swedish women. *J Natl Cancer Inst* 2002;94:497-504.
  30. Lacey JV Jr, Mink PJ, Lubin JH, Sherman ME, Troisi R, Hartge P, et al. Menopausal hormone replacement therapy and risk of ovarian cancer. *JAMA* 2002;288:334-41.
  31. Chiaffarino F, Pelucchi C, Parazzini F, Negri E, Franceschi S, Talamini R, et al. Reproductive and hormonal factors and ovarian cancer. *Ann Oncol* 2001;12:337-41.
  32. Sit AS, Modugno F, Weissfeld JL, Berga SL, Ness RB. Hormone replacement therapy formulations and risk of epithelial ovarian carcinoma. *Gynecol Oncol* 2002;86:118-23.
  33. Grady D, Gebretsadik T, Kerlikowske K, Ernster V, Petitti D. Hormone replacement therapy and endometrial cancer risk: a meta-analysis. *Obstet Gynecol* 1995;85:304-13.
  34. Grodstein F, Newcomb PA, Stampfer MJ. Postmenopausal hormone therapy and the risk of colorectal cancer: a review and meta-analysis. *Am J Med* 1999;106:574-82.
  35. Nanda K, Bastian LA, Hasselblad V, Simel DL. Hormone replacement therapy and the risk of colorectal cancer: a meta-analysis. *Obstet Gynecol* 1999;93:880-8.
  36. Cheung AM, Feig D, Kapral M, Diaz-Granados N, Dodin S, et al. Groupe d'étude canadien sur les soins de santé préventifs. La prévention de l'ostéoporose et des fractures ostéoporotiques chez les femmes ménopausées. Recommandations du Groupe d'étude canadien sur les soins de santé préventifs. *JAMC* 2004;170(11):1665-7.
  37. Grodstein F, Colditz GA, Stampfer MJ. Postmenopausal hormone use and cholecystectomy in a large prospective study. *Obstet Gynecol* 1994;83(1):5-11.
  38. Shumaker SA, Legault C, Rapp SR, Thal L, Wallace RB, Ockene JK, et al; WHIMS Investigators. Estrogen plus progestin and the incidence of dementia and mild cognitive impairment in postmenopausal women: the Women's Health Initiative Memory Study: a randomized controlled trial. *JAMA* 2003;289(20):2651-62.
  39. Grady D, Brown JS, Vittinghoff E, Applegate W, Varner E, Snyder T; HERS Research Group. Postmenopausal hormones and incontinence: the Heart and Estrogen/Progestin Replacement Study. *Obstet Gynecol* 2001;97(1):116-20.
  40. Hays J, Ockene JK, Brunner RL, Kotchen JM, Manson JE, Patterson RE, et al. Effects of estrogen plus progestin on health-related quality of life. *N Engl J Med* 2003;348(19):1-16.
  41. Rapp SR, Espeland MA, Shumaker SA, Henderson VW, Brunner RL, Manson JE, et al; WHIMS Investigators. Effect of estrogen plus progestin on global cognitive function in postmenopausal women: the Women's Health Initiative Memory Study: a randomized controlled trial. *JAMA* 2003;289(20):2663-72.
  42. Beaudet MP, Walop W, Le Petit C. Caractéristiques des femmes utilisant l'hormonothérapie substitutive. *Rapports sur la santé* 1997;9(2). Ottawa : Statistique Canada. N° de cat. 82-003-XPB.
  43. Kaufert P, Boggs PP, Ettinger B, Woods NF, Utian WH. Women and menopause: beliefs, attitudes, and behaviors. The North American Menopause Society 1997 Menopause Survey. *Menopause* 1998;5:197-202.
  44. MacLennan A, Lester S, Moore V. Oral estrogen replacement therapy versus placebo for hot flushes: a systematic review. *Climacteric* 2001;4(1):58-74.

**Correspondance :** Groupe d'étude canadien sur les soins de santé préventifs, 117-100 Collip Circle, London (Ontario) N6G 4X8; télécopieur : 519 858-5181; ctf@ctfphc.org.

#### Membres du Groupe d'étude canadien sur les soins de santé préventifs

**Président :** D<sup>r</sup> John W. Feightner, professeur, Département de médecine familiale, Université Western Ontario, London (Ontario).  
**Vice-présidente :** D<sup>r</sup> Harriet MacMillan, professeure agrégée, départements de psychiatrie et de neurosciences du comportement et de pédiatrie, Centre canadien d'étude des enfants à risque, Université McMaster, Hamilton (Ontario). **Membres :** D<sup>rs</sup> Paul Bessette, professeur titulaire, Département d'obstétrique-gynécologie, Université de Sherbrooke, Sherbrooke (Québec); R. Wayne Elford, professeur émérite, Département de médecine familiale, Université de Calgary, Calgary (Alberta); Denice S. Feig, professeur adjointe, départements de médecine, d'obstétrique et de gynécologie, et de gestion et d'évaluation des politiques de la santé, Université de Toronto, Toronto (Ontario); Joanne M. Langley, professeure agrégée, départements de pédiatrie et de santé communautaire et d'épidémiologie, Université Dalhousie, Halifax (Nouvelle-Écosse); Valerie Palda, professeure adjointe, Département de médecine, Université de Toronto, Toronto (Ontario); Christopher Patterson, professeur, Division de la médecine gériatrique, Département de médecine, Université McMaster, Hamilton (Ontario); et Bruce A. Reeder, professeur, Département de santé communautaire et d'épidémiologie, Université de la Saskatchewan, Saskatoon (Saskatchewan). **Personnes-ressources :** Ruth Walton, attachée de recherche, et Jana Fear, adjointe de recherche, Groupe d'étude canadien sur les soins de santé préventifs, Département de médecine familiale, Université Western Ontario, London (Ontario).
